# Supplementary material for: Molecular epidemiology of Klebsiella pneumoniae invasive infections over a decade at Kilifi County Hospital in Kenya
Source: PubMed Central journal article supplement (PMC5615107; doi:10.1016/j.ijmm.2017.07.006), 2017-10

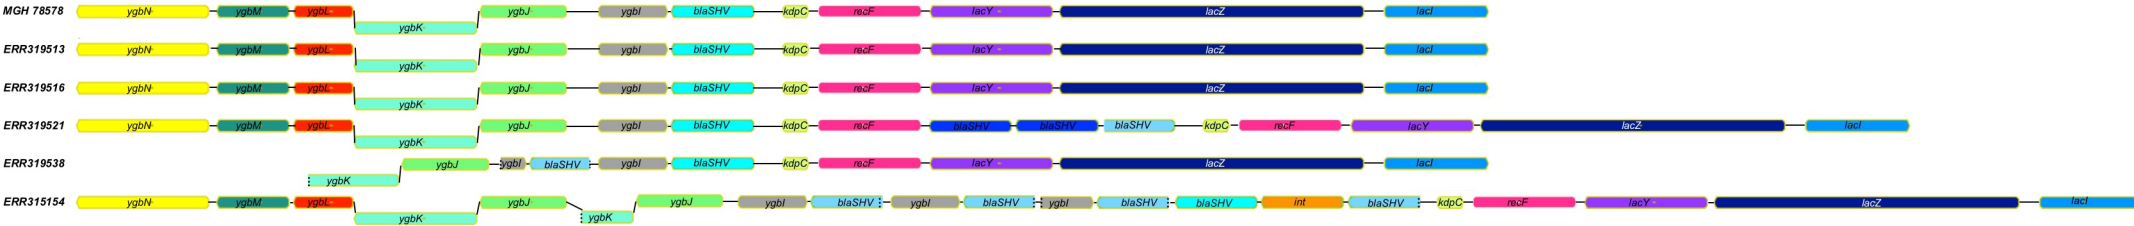

Supplement: mmc4.pdf [file mmc4.pdf]
