# Supplementary material for: Molecular epidemiology of Klebsiella pneumoniae invasive infections over a decade at Kilifi County Hospital in Kenya
Source: PubMed Central journal article supplement (PMC5615107; doi:10.1016/j.ijmm.2017.07.006), 2017-10
Supplement: mmc5.pdf [file mmc5.pdf]

## 1 **Supplemental Methods**

### 2 **Mapping and Assembly**

3 The sequence reads for each isolate were mapped to *K. pneumoniae* MGH 78578 genome (RefSeq:  
4 GCF\_000016305.1) using a pipeline described in (38). For each strain, the raw read pairs were split  
5 into smaller chunks. This reduces the overall memory usage, and allows for the reads to be aligned  
6 using more than one CPU. The reads were then aligned using SMALT, a hashing based aligner. The  
7 aligned reads and unmapped reads were merged into a single BAM file. Picard  
8 (<http://picard.sourceforge.net>) was used to identify and flag optical duplicates, which reduces the  
9 effects of PCR bias.

10

11 The isolates were assembled using a pipeline developed in-house. For each strain, Velvet v1.2.09  
12 (17) was used to create multiple assemblies by varying the kmer size between 66 % and 90 % of the  
13 read length. From these assemblies, the one with the best N50 was chosen and contigs which were  
14 shorter than the insert size length were removed. An assembly improvement step was then run on the  
15 chosen assembly. The contigs of the assembly were scaffolded by iteratively running SSPACE (18).  
16 Then gaps identified as 1 or more N's, were targeted for closure by running 120 iterations of  
17 GapFiller (19). Finally, the reads were aligned back to the improved assembly using SMALT  
18 (<http://www.sanger.ac.uk/resources/software/smalt/>) and a set of statistics was produced for assessing  
19 the QC of the assembly. *De novo* assemblies with N50 < 30,000 and assembled nucleotides < 4 Mb  
20 were excluded from further analyses.

21

### 22 **Genome annotation and core genome**

23 Assembled contigs were annotated using Prokka (20) which predicts proteins, RNA structures,  
24 tRNA, rRNA and tmRNA. The predicted genes were then annotated with data pulled from a number  
25 of databases. A *Klebsiella* genus-specific databases, generated by retrieving the annotation for all of  
26 the genomes for a genus from RefSeq (39), was used. The protein sequences were then merged using  
27 CD-hit (40) to produce a non-redundant blast protein database. Next UniprotKB/SwissProt (41) was  
28 consulted. To qualify for inclusion, a protein must not be a "Fragment" entry; and have an evidence  
29 level ("PE") of 2 or lower, which corresponds to experimental mRNA or proteomics evidence. The

30 protein was then looked up against the HMM profiles from Clusters, Conserved domain database,  
31 Tigrfams, and Pfam (A). The result was output as a GFF file containing an annotated *de novo*  
32 assembly.

33

34 The core genes were determined from the annotated *de novo* assemblies. Predicted coding regions  
35 were extracted and converted to protein sequences. Sequences where more than 5 % of nucleotides  
36 were unknown or which were less than 120 nucleotides were excluded from further analysis.

37 Sequences without a start or stop codon were filtered out. CD-hit was used to iteratively perform a  
38 first pass clustering. The protein sequences were then clustered beginning with a sequence identity of  
39 100 % and a matching length of 100 %. If a sequence was found in every isolate, it was said to be a  
40 conserved gene and the cluster added to the final results. All of these sequences were then removed  
41 and not considered for blast analysis. CD-hit was repeated again with a lower threshold, reducing by  
42 0.1 % down to 98 %, with conserved clusters removed at each stage. The clusters were labeled with  
43 the most commonly occurring gene names assigned to the sequences in the cluster. If there was no  
44 annotated gene name, a unique identifier was generated. The functional annotation was also recorded  
45 for each cluster.
